# Supplementary material for: Atmospheric particulate matter aggravates CNS demyelination through involvement of TLR-4/NF-kB signaling and microglial activation
Source: eLife journal article supplement (doi:10.7554/elife.72247), 2022-02-23
Supplement: supp [file Figure 1 -Source Data 1 Raw source data for B-G.xlsx]

## Sheet: Figure 1B
Clincal score
Days	Ctrl				PM
-30	0	0	0	0	0	0	0	0
-29	0	0	0	0	0	0	0	0
-28	0	0	0	0	0	0	0	0
-27	0	0	0	0	0	0	0	0
-26	0	0	0	0	0	0	0	0
-25	0	0	0	0	0	0	0	0
-24	0	0	0	0	0	0	0	0
-23	0	0	0	0	0	0	0	0
-22	0	0	0	0	0	0	0	0
-21	0	0	0	0	0	0	0	0
-20	0	0	0	0	0	0	0	0
-19	0	0	0	0	0	0	0	0
-18	0	0	0	0	0	0	0	0
-17	0	0	0	0	0	0	0	0
-16	0	0	0	0	0	0	0	0
-15	0	0	0	0	0	0	0	0
-14	0	0	0	0	0	0	0	0
-13	0	0	0	0	0	0	0	0
-12	0	0	0	0	0	0	0	0
-11	0	0	0	0	0	0	0	0
-10	0	0	0	0	0	0	0	0
-9	0	0	0	0	0	0	0	0
-8	0	0	0	0	0	0	0	0
-7	0	0	0	0	0	0	0	0
-6	0	0	0	0	0	0	0	0
-5	0	0	0	0	0	0	0	0
-4	0	0	0	0	0	0	0	0
-3	0	0	0	0	0	0	0	0
-2	0	0	0	0	0	0	0	0
-1	0	0	0	0	0	0	0	0
0	0	0	0	0	0	0	0	0
1	0	0	0	0	0	0	0	0
2	0	0	0	0	0	0	0	0
3	0	0	0	0	0	0	0	0
4	0	0	0	0	0.5	0	0	0
5	0	0	0	0	0.5	0	0	0
6	0	0	0	0	0.5	0	0	0
7	0	0	0	0	0.5	0	0	0
8	0	0	0	0	1.5	1	0.5	0
9	0	0	0	0	3	2.5	1.5	1.5
10	0	0	0	0	3	3	3	3
11	0	0.5	0.5	0	3	3	3	3
12	0	2	1	0	3.5	3	3	3
13	1	3	1	0	3.5	3	3	3
14	1	3	2	3	3.5	3	3	3
15	1.5	3	2.5	3	3.5	3.5	3	3
16	3	3	3	3	3.5	3.5	3	3
17	3	3	3	3	3	3.5	3	3
18	3	2.5	3	3	3	3.5	3	3
19	3	1.5	3	3	3	3.5	3	3
20	3	1.5	2.5	3	3	3	3	3
21	2.5	1.5	1.5	3	3	3	3	3.5
22	2.5	1.5	1.5	3	3	3	3	3.5
23	1.5	1.5	1.5	2.5	3	3	3.5	3.5
24	1.5	1.5	1.5	2.5	3	3	3.5	3.5
25	1.5	1.5	1.5	2.5	3	3	3.5	3.5
26	1.5	1.5	1.5	2	3	3	3.5	3
27	1.5	1.5	1.5	1.5	3	3	3.5	3
28	1.5	1.5	3	2	3	3	3	3
29	1.5	1.5	3	2	3	3	3	3
30	1.5	1.5	3	3	3	3	3	3.5

## Sheet: Figure 1C
Clincal score
PBS	PM
1	2
1	2.5
1	2.5
1.5	2.5
1.5	3
1.5	3
1.5	3
1.5	3
2	3
2	3
2	3
2	3.5
2.5	3.5
3	3.5
3	3.5

## Sheet: Figure 1D
Pathological scores
	PBS						PM
Inflammation	1	2	2	2	1	2	3	2	2	3	3	2
Demyelination	2	2	1	1	1	1	3	3	3	3	3	2.5

## Sheet: Figure 1E
MNC
PBS										PM
7	3.6	3.3	7.1	6.6	6.2	6.6	7.8	6.9	7.3	16.2	12.6	12.3	10.9	13.6	16.9	13.5	12.6	13.3	17.2

## Sheet: Figure 1F
MBP+ cells per field
PBS										PM
51	42	40	42.3	55	46	48	50	49	53	12	10	13	19.5	11.5	26	13.6	12.9	11.7	13.4
IBA1+ cells per field
PBS										PM
41	36	33	39	38	45	56	38	31	44	120	99	45	115	88	86	126	116	119	106
A2B5+ cells per field
PBS										PM
66	69	76	59	62	40	69	56	58	62	180	166	156	181	172	169	155	182	145	155
GFAP+ cells per field
PBS										PM
150	142	166	145	158	169	139	152	146	144	169	142	155	166	165	172	168	172	156	144

## Sheet: Figure 1G
Cell numbers × 10^4
	PBS			PM
CD45+	53	51	42	151	132	123
CD45+CD11b+	27.9	22	23	38.7	42.5	49.2
CD45+CD11b-	6.55	8.05	5	15	21.1	18
CD11b+	53.7	46	51	51.1	65.6	56
CD11b+CD80+	62.2	58.2	60.1	69.7	72.3	71.1
CD11b+CD86+	17.3	18.5	16.3	20.1	25.4	29.2
CD11b+MHCII+	72.4	71.3	70.2	78.4	82.5	88.6
CD11c+	39.6	35.4	33.2	43.9	45.8	49.2
CD11c+CD80+	21.8	18.2	19.3	24.8	30.5	28.9
CD11c+CD86+	28.9	22.1	20	32.9	44	39.6
CD11c+MHCII+	74.8	72.1	68.5	78.1	85.2	82.1
CD8+	20	18.7	16.9	23.5	27.4	25.1
CD4+	41.1	51.7	38.2	55.9	59.6	69.2
CD4+IL17+	16.9	15.6	13.2	25.3	31.5	28.4
CD4+IFNγ+	28	22.8	21	41	56.6	48.5
CD4+Foxp+	8.89	10.09	7	8.37	9.87	6
CD4+IL10+	1.4	1.7	1	2.56	3.16	1
