# Supplementary material for: Atmospheric particulate matter aggravates CNS demyelination through involvement of TLR-4/NF-kB signaling and microglial activation
Source: eLife journal article supplement (doi:10.7554/elife.72247), 2022-02-23
Supplement: supp [file Figure 1- figure supplement 1source data 1 Raw source data.xlsx]

## Sheet: Figure S1
Percentage of cells (%)
	PBS			PM
CD11c+	62.2	64.8	59.6	69.7	71.9	67.5
CD11c+CD80+	16.5	17.2	15.8	22.1	22.6	21.6
CD11c+CD86+	27.2	28.7	25.7	33.3	34.4	32.2
CD11c+MHCII+	71.2	72.8	69.6	81.5	83	80
CD8+	13.2	14.15	12.25	18.5	19.25	17.75
CD4+	15.7	16.9	14.5	26.1	27	25.2
CD4+IL17+	15.8	17.2	14.4	26.5	26.8	26.2
CD4+IFNγ+	27.6	29.2	26	44.2	45.7	42.7
CD4+TNFα+	35.8	36.1	35.5	48.2	48.4	48
