# Supplementary material for: Atmospheric particulate matter aggravates CNS demyelination through involvement of TLR-4/NF-kB signaling and microglial activation
Source: eLife journal article supplement (doi:10.7554/elife.72247), 2022-02-23
Supplement: supp [file Figure 2 -Source Data 1 Raw source data for B, C, E.xlsx]

## Sheet: Figure 2B
Body weight (g)
Days	Naïve								CPZ+PBS								CPZ+PM
0	18.29	16.95	17.38	16.93	17.34	22.03	22.03	16.93	18.51	19.48	18.93	18.74	18.82	17.52	17.91	19.72	20.29	19.36	17.31	18.08	18.53	19.93	19.81	18.12
3	18.88	20.1	22.58	17.75	17.13	17.52	17.52	17.75	19.02	19.57	18.65	19.56	19.06	20.5	18.25	18.07	18.65	20.22	17.88	19.45	20.54	18.58	19.62	19.32
6	20.52	18.37	22.42	20.31	17.91	17.21	17.21	20.31	19.27	19.94	20.3	21.64	20.35	19.84	19.73	18.67	20.27	19.19	21.71	17.54	20.92	19.55	19.28	19.84
10	18.2	20.7	19.1	18.5	23.2	20.33	20.33	18.5	20.71	20.7	23	20.26	20.9	20.01	19.8	20.95	20.5	22.95	21.8	20.75	18.35	20.66	20.46	20.9
14	23.25	18.9	18.3	20.64	18.42	21.11	21.11	20.64	19.1	19.53	20.49	20.15	20.5	19.97	19.4	21.25	20.28	23.25	22.69	20.51	21.4	18.4	20.92	21
17	24.25	19.01	22.6	18.96	22.36	22.16	22.16	18.96	21.91	21.03	20.95	23.13	24.53	21.5	20.85	20.43	22.51	23.75	21.35	18.7	22.32	20.55	21.53	21.84
20	22.65	22.54	24.64	20.61	19.35	22.96	22.96	20.61	24.96	21.02	20.45	22.44	23.04	20.96	21.34	21.87	20.72	24.56	24.13	21.33	20.56	22.97	22.24	21.81
22	20.2	24.42	23.47	22.72	19.26	23.05	23.05	22.72	21.48	23.73	21.54	21.34	24.61	23.17	20.31	22.01	21.54	21.4	23.43	24.69	20.36	18.85	22.14	22.15
25	22.03	21.74	23.42	19.98	23.17	19.26	19.26	19.98	23.97	20.64	19.82	21.15	21.05	20.63	21.95	22.75	21.11	24.61	24.58	23.25	18.94	21.82	21.88	20.89
27	19.31	24.18	20.86	24.74	20.22	23.58	23.58	24.74	20.46	25.76	22.23	21.4	21.79	21.48	21.36	23.49	21.45	19.12	24.1	22.84	21.32	25.06	22.02	21.3
29	20.38	21.43	23.23	25.33	25.44	20.79	20.79	25.33	21.27	21.44	19.62	20.62	24.43	21.79	23.76	23.1	20.23	18	23.42	23.06	21.66	20.42	20.89	21.28
31	26.04	24.09	21.2	22.05	20.32	25.51	25.51	22.05	23.38	19.52	19.69	19.12	21.28	20.22	19.17	20.38	19.1	22.36	17.19	22.14	19.74	20.7	19.47	20.05
33	26.3	22.17	26.5	24.47	20.7	21.35	21.35	24.47	19.4	19.68	22.95	18.23	18.76	17.79	21.51	19.9	18.34	20.56	19.53	16.77	19.23	21.25	18.61	19.38
35	26.81	22.32	24.7	26.2	21.58	20.31	20.31	26.2	20.15	19.03	17.76	17.97	18.25	22.45	19.11	18.13	16.22	21.32	18.19	20.75	19	18.4	18.56	18.67
37	26.56	21.21	24.57	22.58	21.55	26.37	26.37	22.58	22.5	19.8	18.15	19.67	17.8	16.37	17.94	18.8	20.89	15.93	21.3	17.88	19.11	18.9	18.63	19
41	22.04	27.54	26.95	25.93	23.56	22.6	22.6	25.93	21.33	17.55	19.37	17.5	18.26	18.76	14.81	20.69	19.57	17.88	19.64	20.49	20.47	19.07	19.35	16.07
45	26.35	22.06	27.63	23.89	28.32	22.55	22.55	23.89	18.74	24.63	20.05	20.23	18.77	17.6	21.36	20.59	19.23	22.72	16.47	22.44	19.7	21.63	20.48	19.7
47	28.39	26.43	24.09	21.65	22.62	28.01	28.01	21.65	20.73	20.34	18.89	24.7	18.82	17.84	20.69	18.6	21.9	21.03	20.18	19.57	19.88	15.78	21.94	23.07
49	21.8	28.93	28.74	24.53	22.98	28.64	28.64	24.53	20.82	24.88	19.22	20.4	18.83	19.08	20.72	19	19.72	20.95	19.82	21.71	19.28	23.07	20.24	22.52
51	23.92	23.07	27.59	27.8	21.45	28.64	28.64	27.8	19.01	25.2	19.41	20.85	20.97	18.63	20.45	19.4	19.72	19.82	21.04	19.52	21.13	22.61	16.6	24
53	28.4	23.31	27.02	27.61	29.1			27.61	24.57	18.85	21.32	18.74	20.82				21.84	20.38	22.5	20.22	24.32	22.96	17.75
55	29.53	25.2	23.6	27.45	29.95			27.45	19.3	18.76	21.1	24.42	21.3				20.14	21.62	22.08	23.37	19.42	16.92	22.45
57	29.3	22.9	29.64	26.66	27.33			26.66	23.95	20.95	21.04	19.04	18.65				19.17	21.62	21.99	16.48	22.95	22.67	19.03
59	26.78	28.68	24.04	26.73	29.96			26.73	21.16	24.9	20.82	19.19	19.33				21.75	22.48	20.21	22.4	19.8	23.21	16.69
61	28.84	28.86	29.68	26.76					19.06	18.93	24.6	21.23					19.75	16.41	22.13	22.04	20.3	22.08
63	30.21	28.95	29.43	26.93					21.28	25.23	24.17	24.46					23.08	22.09	22.6	22.34	19	22
65	30.5	28.35	28.39	26.04					21.57	25.25	24.76	27.39					23.24	24.77	23.3	20.64	22.11	23.37
67	30.9	29.4	28.66	26.69					23.2	26.55	25.3	25.4					23.24	24.8	24.4	20.69	23.55	24.51
70	30.52	30.57	28.57	26.42					25.47	26.9	26.3	26.4					20.34	25.8	24.72	20.97	23.55	24.51

## Sheet: Figure 2C
Demyelination scores
	PBS						PM
3W	1	1	1	1	0	0	2	1	1	1	2	2
4+2W	2	1	1	1	2	2	3	3	3	3	2	2
Fluoromyelin intensity per field (%)
	PBS					PM
3W	29	33.91	28.18	30.21	28.29	17.16	22.9	22.45	17.3	20.57
4+2W	22.1	21.1	25.1	17.4	16.2	12.1	14.3	15.2	14.1	13.1
IBA1+ cells per field
	PBS					PM
3W	6.4	6.3	5.1	7.2	7.3	14.5	15.1	16.4	15.2	15.6
4+2W	4.4	5.3	5.1	6.2	6.8	12.5	11.1	13.4	14.2	13.6
GFAP+ cells per field
	PBS					PM
3W	3.5	4	5	6	8	17	12	14	15	16
4+2W	6.2	7.1	8	6.4	7.6	11.4	12.6	13.2	12.3	10.2

## Sheet: Figure 2E
G-ratio			Number of myelination axon
PBS	PM		PBS	PM
0.835269	0.866394		240	130
0.815247	0.842291		300	123
0.850262	0.928284		220	167
0.784816	0.94413		250	158
0.831923	0.906327		260	174
0.825131	0.858248
0.793016	0.862992
0.812055	0.818642
0.811874	0.943951
0.800993	0.884024
0.821984	0.853483
0.827394	0.781879
0.897403	0.884241
0.828324	0.819994
0.798122	0.858833
