# Supplementary material for: Atmospheric particulate matter aggravates CNS demyelination through involvement of TLR-4/NF-kB signaling and microglial activation
Source: eLife journal article supplement (doi:10.7554/elife.72247), 2022-02-23
Supplement: supp [file Figure 3 -Source Data 1 Raw source data for C, E, F, G.xlsx]

## Sheet: Figure 3C
MBP intensity per field (%)
PBS										PM
33	45	24	30	29	46	38	20	36	33	10	12	11	9	11.5	10	8	8.6	11	9
IBA1+ intensity per field
PBS										PM
20	17	18	19	13	15	39	30	19	27	80	78	88	88	85	75	90	89	96	106
GFAP+ intensity per field
PBS										PM
20	10	12	18	13	17	14	15	15	14	78	68	67	73	72	88	92	95	62	70

## Sheet: Figure 3E
G-ratio			Number of myelination axon
PBS	PM		PBS	PM
0.683527	0.866394		800	640
0.655247	0.842291		820	660
0.670262	0.928284		810	662
0.678482	0.94413		770	650
0.661923	0.906327		780	666
0.725131	0.858248
0.793016	0.862992
0.681206	0.818642
0.681187	0.943951
0.680099	0.884024
0.821984	0.853483
0.727394	0.781879
0.797403	0.884241
0.728324	0.819994
0.798122	0.858833

## Sheet: Figure 3F
Relative Expression
	PBS				PM
Gfap	1.02278	1.14274	0.830758	1.0299	4.03481	4.20615	4.79822	4.35448
Inos	0.786399	0.961483	1	1.32256	8.27932	7.25896	8.32568	5.59848
Tnfa	1	1	1	1	3.62811	3.61985	3.79004	3.99332
Il1b	1.31951	1	0.503478	1.50525	22.6342	20.1113	21.6342	19.1113
Il6	0.629961	2.14851	1	0.73884	7.58597	7.33988	7.90811	7.16807
Il10	0.974342	0.95429	0.947698	1.13485	0.243164	0.444421	0.460094	0.473029
Relative Expression
	PBS				PM
Mog	0.981119	1.05885	0.994815	0.967612	0.38177	0.390224	0.290858	0.280858
Mbp	0.974342	0.95429	0.947698	1.13485	0.28174	0.375402	0.181739	0.280099
Pdgfra	0.981119	1.05885	0.994815	0.967612	0.692555	0.737135	0.773782	0.82932
Igf1	0.974342	0.95429	0.947698	1.13485	0.85	0.75	0.689	0.7195

## Sheet: Figure 3G
Rotating
PBS										PM
49	34	61	49	41	41	32	43	51		35	32	21	29	31	29	20	27	35	44
Bean walking
PBS										PM
11	27	12	20	15	22					31	25	45	35	50	23	24	24	27	34
Tight rope
PBS										PM
20	22	22	23	20	20	22	22	27	25	35	24	26	26	33	23	30	25	26	25
