# Supplementary material for: Atmospheric particulate matter aggravates CNS demyelination through involvement of TLR-4/NF-kB signaling and microglial activation
Source: eLife journal article supplement (doi:10.7554/elife.72247), 2022-02-23
Supplement: supp [file Figure 4 -Source Data 1 Raw source data for C-J.xlsx]

## Sheet: Figure 4C
Relative expression
	PBS				LPS				PM
Tnfa	0.974342	1.01572	0.967612	1.04427	3.51	3.46	3.44	3.46	2.11	2.2	2.19	2.19
Il6	1.04066	0.991373	0.998269	0.970971	8.59333	8.50333	8.45333	8.50333	4.78333	4.81333	4.82333	4.81333
Il1b	1.04066	0.991373	0.998269	0.970971	6.97667	6.98667	6.86667	6.98667	4.63667	4.60667	4.53667	4.60667
Inos	0.974342	1.01572	0.967612	1.04427	3.27667	3.19667	3.16667	3.19667	0.536667	0.566667	0.546667	0.566667
Ccl2	1.04427	0.974342	1.01572	0.967612	1.01572	0.974342	0.915416	1.10382	25.1502	22.9831	22.3546	25.5013
Cd86	0.974342	1.01572	0.967612	1.04427	2.07412	2.39911	2.1177	1.98963	3.46415	3.1005	3.03669	3.46415
Ptgs2	1.04066	0.991373	0.998269	0.970971	14.2956	15.7524	13.3383	14.2956	56.3952	51.5357	51.5357	51.1797
Clec7a	1.10957	0.959264	1	0.939523	2.39496	2.32947	2.12874	2.25012	1.24833	1.54757	1.61328	1.54757
Stat3	1.10765	1.05519	0.918594	0.931418	1.90198	2.44105	2.32543	2.3579	2.26185	2.11038	1.73809	2.26185
Stat6	0.920188	0.90125	1.06437	1.13288	0.20527	0.391853	0.12	0.31873	0.926588	0.882703	0.773782	0.913831
Il10	1.10957	0.959264	1	0.939523	0.2	0.16	0.35	0.33	0.29	0.309	0.302	0.169
Il4	1.10765	1.05519	0.918594	0.931418	0.82645	1.17691	1.2105	1.17691	0.530344	0.680657	1.16878	0.680657
Arg1	0.920188	0.90125	1.06437	1.13288	0.339151	0.289172	0.303549	0.289172	0.19751	0.194791	0.169576	0.194791

## Sheet: Figure 4D
Concentration(pg/ml)
	PBS				LPS				PM
Tnfa	10	12	11	10	700.467	735.314	621.101		440.143	417.037	330.074
Il6	12	15	11	10	886.31	905.732	892.282	990.671	489.387	583.406	612.842	601.85

## Sheet: Figure 4E
Cell numbers × 10^4
	PBS			LPS			PM
CD4+IL17+	5.1	5.22	4.89	17.7	18.2	17.6	19.33	20.56	18.21
CD4+IFNγ+	56.29	53.33	55.89	54.7	55.6	57.2	28.03	30.51	32.44

## Sheet: Figure 4F
Numbers of MBP+ cells/field
Control										PBS-CM										LPS-CM										PM-CM
35	30	36	48	30	31	33	29	34	39	49	58	48	36	31	35	37	39	34	42	12	15	19	16	18	22	11	13	18	14	13	12	15	19	15	26	14	17	16	20
Branch score of MBP+ cells
Control										PBS-CM										LPS-CM										PM-CM
4	5	5	3	5	5	5	4	5	5	4	4	5	5	3	4	5	5	5	4	2	3	2	2	3	2	2	1	3	4	2	1	2	3	2	2	4	3	2	1

## Sheet: Figure 4G
p-NF-κB/β-actin expression
PBS				LPS				PM
0.51562	0.53363	0.52961	0.51907	0.66922	0.67147	0.65058	0.64873	0.876465	0.872417	0.91494	0.921193

## Sheet: Figure 4H
mRNA relative expression of pro-inflammatory cytokines
	Tnfa			Il1b			Il6
PBS	8.365	8.455	8.145	4.315	4.045	4.015	1.2	1	0.8
LPS	13.955	13.945	13.855	15.115	15.255	15.175	15.635	15.515	15.435
PM	12.215	15.155	16.135	11.205	10.825	16.145	18.065	17.915	12.065
PM+TAK242	9.685	9.685	9.665	8.505	8.475	8.455	4.975	5.165	5.095
PM+ST2825	12.255	12.345	12.395	11.245	11.345	11.265	9.475	9.405	9.515
PM+SN50	11.255	11.315	11.255	10.875	10.915	10.865	9.085	8.925	9.035

## Sheet: Figure 4I
TNF-α concentration (pg/ml)
PBS	LPS	PM	PM+TAK242	PM+ST2825	PM+SN50
25	845	828	551	777	757
38	878	835	582	729	715
29	851	852	613	694	731
39	851	852	613	664	687

## Sheet: Figure 4J
Mean clinical scores
	PBS			PM			PM+PDTC			PM+TAK242
1	0	0	0	0	0	0	0	0	0	0	0	0
2	0	0	0	0	0	0	0	0	0	0	0	0
3	0	0	0	0	0	0	0	0	0	0	0	0
4	0	0	0	0	0	0	0	0	0	0	0	0
5	0	0	0	0	0	0	0	0	0	0	0	0
6	0	0	0	0	0	0	0	0	0	0	0	0
7	0	0	0	0	0	0	0	0	0	0	0	0
8	0	0	0	0	0.5	0.5	0	0	0	0	0	0
9	0	0	0	0.5	1	1	0	0	0	0	0	0
10	0	0.5	0	1	1	1	0	0.5	0	0	0	0
11	0.5	0.5	0.5	1	1	1	0	0.5	0	0	0	0
12	0.5	0.5	0.5	1	1	1	0	0.5	0	0.5	0	0
13	0.5	0.5	0.5	1	1	1	0.5	0	0	0	0	0
14	0.5	0.5	0.5	1	1.5	1	0.5	0	0.5	0	0	0
15	0.5	1	0.5	2	2.5	1	0.5	0	0.5	0	0	0.5
16	0.5	1	0.5	3	3	1	0.5	0	0.5	0.5	0	0.5
17	1	1	0.5	3	3.5	1	0.5	0	0.5	0	0	0.5
18	1.5	3	1	3	3.5	1.5	1	0.5	0.5	0	0	0.5
19	3	3	1	3	3	2.5	1	1	1	0	0	0
20	3	3	1.5	3	3	3	1	1	1	0	0	0
21	3	3	3	3	3	2.5	1	1	1	0	0	0
22	3	3	3	3	3	2.5	1	1	1	0	0	0
23	3	3	3	3	3	2.5	1	1	1	0	0	0
24	2.5	3	2	3	3	2.5	1	0.5	1	0	0	0
25	2.5	3	1.5	3	3	2.5	1	0.5	1	0	0	0
26	2.5	3	1.5	3	3	2.5	1	0.5	1	0	0	0
27	2	3	1.5	3	3	2.5	1	0.5	1	0	0	0
28	2	3	1.5	3	3	2.5	1	0.5	1	0	0.5	0
29	2	3	1.5	3	3.5	3	1	1	1	0	1	0
30	2	3	1.5	3	3.5	3	1	1	1	0	1	0
