# Supplementary material for: Atmospheric particulate matter aggravates CNS demyelination through involvement of TLR-4/NF-kB signaling and microglial activation
Source: eLife journal article supplement (doi:10.7554/elife.72247), 2022-02-23
Supplement: supp [file Figure 4- figure supplement 1source data 1 Raw source data for A, B, D, E.xlsx]

## Sheet: Figure S2A
Percentage of IFN-γ+ cells （%）
Control			LPS			PM
12.896	13.594	14.494	16.89	17.5	17.91	21.16	21.87	22.68
Percentage of IFN-γ+ cells （%）
Control			LPS			PM
47.77	55.02	55.56	44.7	50.42	50.93	40.67	50.64	51.47

## Sheet: Figure S2B
Relative expression
	Control				LPS				PM
H2-d1	0.924265	0.914229	1.07014	1.10588	8.55318	8.22735	7.9595	8.04989	1.17814	1.15215	1.01359	1.07016
Gbp2	0.955178	0.94873	1.14188	0.966391	20.9629	20.5377	21.2395	20.5648	1.18265	0.859753	1.01392	1.27346
Srgn2	1.04952	0.928787	1.108	0.925881	6.89702	7.69213	6.83441	7.93849	0.741095	0.751048	0.839197	0.659963
S100a10	0.947012	1.04323	1.04702	0.966735	0.885676	1.1451	0.926213	1.0151	1.12068	1.06853	1.43827	1.35926
Ptx3	1.01069	1.02666	0.983528	0.979878	1.41724	1.59146	1.59512	1.71718	0.828464	0.879939	1.2116	0.84743

## Sheet: Figure S2D
% of total cells
	PDGFRα+ cells						CNPase+ cells
Control	36.364	21.951	18.919	4.7619	10	11.111	63.636	80.488	81.081	95.238	90	88.889
CNTF+T3	12.245	9.3023	10.526	10.417	10.976	7.6923	87.755	90.698	89.474	89.583	89.024	92.308
LPS	41.463	36.667	60	53.846	50	31.818	58.537	63.333	40	46.154	50	68.182
25	24.242	61.905	42.857	25	45.161	25	75.758	38.095	57.143	75	54.839	75
50	46.154	50	36.842	39.474	71.429	41.667	53.846	50	63.158	60.526	28.571	58.333
100	56.667	65.116	50	79.167	40.678	52.381	43.333	34.884	50	20.833	59.322	47.619

## Sheet: Figure S2E
Relative percentage (%)
	Low						Medium						High
Control	37.5	20	0	33.3333	0	0	25	20	50	33.3333	33.3333	0	37.5	60	50	33.3333	66.6667	100
CNTF+T3	16.6667	11.1111	0	13.3333	6.25	0	25	33.3333	41.6667	26.6667	18.75	25	58.3333	55.5556	58.3333	60	75	75
LPS	54.5455	50	25	50	44.4444	28.5714	27.2727	25	25	33.3333	22.2222	28.5714	18.1818	25	50	16.6667	33.3333	42.8571
25	28.5714	0	33.3333	0	57.1429	50	28.5714	28.5714	16.6667	28.5714	28.5714	20	42.8571	71.4286	50	71.4286	14.2857	30
50	60	50	61.5385	33.3333	60	35.2941	40	30	23.0769	33.3333	40	29.4118	0	20	15.3846	33.3333	0	35.2941
100	52.6316	52.9412	69.2308	70	47.3684	54.5455	36.8421	35.2941	15.3846	10	26.3158	36.3636	10.5263	11.7647	15.3846	20	26.3158	9.09091
