# Supplementary material for: Atmospheric particulate matter aggravates CNS demyelination through involvement of TLR-4/NF-kB signaling and microglial activation
Source: eLife journal article supplement (doi:10.7554/elife.72247), 2022-02-23
Supplement: supp [file Figure 5 -Source Data 1 Raw source data for B.xlsx]

## Sheet: Figure 5B
Relative expression
	PBS				PM
Mmp2	0.972655	1.01396	1.01396	0.972655	1.71713	1.77768	1.8025	1.77768
Nod2	0.986233	1.00696	1.01396	1.00696	2.41162	2.39496	2.47941	2.41162
Tnfrsf1b	1.03527	0.972655	1.03527	0.972655	6.64718	7.70527	8.68179	6.68179
Tnfaip3	1.09429	0.939523	0.972655	0.972655	3.43426	3.18215	3.41054	3.41054
Fas	0.913831	1.02101	1.06437	1.1	3.55537	3.36359	3.55537	3.41054
Nfkb1	1	0.946058	1.06437	0.89	9.53688	11.5157	10.5476	10.2
